# Supplementary material for: Cooperation and competition of hydrogen and halogen bonds in 2D self-assembled nanostructures based on bromine substituted coumarins
Source: Royal Society of Chemistry journal article supplement (doi:10.1039/c9nj04726c), 2019-01-01
Supplement: c9nj04726c1.pdf [file c9nj04726c1.pdf]

## ***Supplementary Information***

### **Cooperation and competition of hydrogen and halogen bonds in 2D self-assembled nanostructures based on bromine substituted coumarins**

*Bao Zha<sup>ac</sup>, Jinxing Li,<sup>b</sup> Juntian Wu,<sup>b</sup> Xinrui Miao,<sup>\*, b</sup> and Min Zhang,<sup>\*a</sup>*

<sup>a</sup> School of Electronic and Computer Engineering, Peking University, Shenzhen 518055,  
People's Republic of China.

<sup>b</sup> College of Materials Science and Engineering, South China University of Technology,  
Guangzhou 510640, People's Republic of China.

<sup>c</sup> Shenzhen China Star Optoelectronics Technology Co., Ltd, Shenzhen 518132, People's  
Republic of China.

**Corresponding authors:** Xinrui Miao (msxrmiao@scut.edu.cn)

Min Zhang (zhangm@ece.pku.edu.cn)

## Experimental Section

### 1. General Information

<sup>1</sup>H spectra were recorded out on a Bruker AV-600 MHz NMR spectrometer.

### 2. Synthesis and Characterization of Co16 (3a), 6-Br-Co16(3b) and 6,8-Br-Co16 (3c)

#### 2.1. Scheme S1.

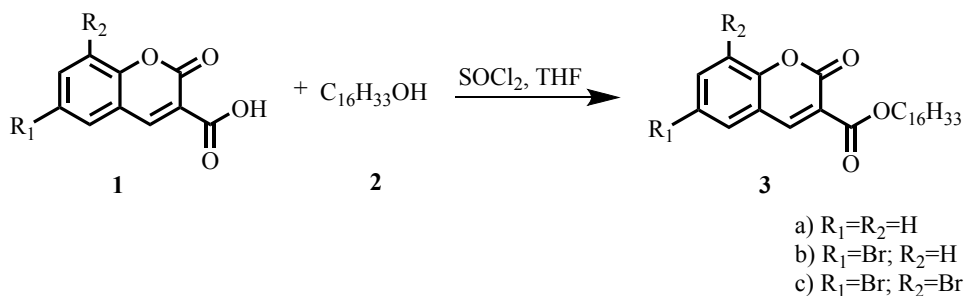

**Compound 3a:** hexadecyl ester coumarin-3-carboxylate (**Co16**); **Compound 3b:** hexadecyl ester-6-bromo-coumarin-3-carboxylate (**6-Br-Co16**); **Compound 3c:** hexadecyl ester-6,8-dibromo-coumarin-3-carboxylate (**6,8-Br-Co16**) were synthesized as previously reported in the literature.<sup>1</sup>

**Compound 3a** The coumarin-3-carboxylic acid (1.90 g 10 mmol) was dissolved in SOCl<sub>2</sub> (20 mL) and the reaction mixture was stirred at 80 °C for 6 h. The SOCl<sub>2</sub> was removed under reduced pressure. *n*-Hexadecanol (4.85 g, 20 mmol) and THF (30 mL) were added to the mixture, which was stirred at 100 °C for another 2 h. The solvent was removed by vacuum. The crude product was subjected to column chromatography (Silical gel 10% EA/PE) to give **3a** as a solid.

**Data for 3a.** <sup>1</sup>H NMR (600 MHz, CDCl<sub>3</sub>, ppm): δ 8.51 (1H, m), 7.61 (2H, m), 7.35 (2H, m), 4.35 (2H, m), 1.78 (2H, m), 1.26 (26H, m), 0.88 (3H, m).

**Compound 3b** The 6-bromo coumarin-3-carboxylic acid (2.69 g 10 mmol) was dissolved in SOCl<sub>2</sub> (20 mL) and the reaction mixture was stirred at 80 °C for 6 h. The SOCl<sub>2</sub> was removed under reduced pressure. *n*-Hexadecanol (4.85 g, 20 mmol) and THF (30 mL)

were added to the mixture, which was stirred at 100 °C for another 2 h. The solvent was removed by vacuum. The crude product was subjected to column chromatography (Silical gel 10% EA/PE) to give **3b** as a solid.

**Data for 3b.** <sup>1</sup>H NMR (600 MHz, CDCl<sub>3</sub>, ppm): δ 8.41 (1H, m), 7.75 (1H, m), 7.71 (1H, m), 7.21 (1H, m), 4.35 (2H, m), 1.77 (2H, m), 1.26 (26H, m), 0.88 (3H, m).

**Compound 3c** The 6,8-dibromo coumarin-3-carboxylic acid (3.47 g 10 mmol) was dissolved in SOCl<sub>2</sub> (20 mL) and the reaction mixture was stirred at 80 °C for 6 h. The SOCl<sub>2</sub> was removed under reduced pressure. *n*-Hexadecanol (4.85 g, 20 mmol) and THF (30 mL) were added to the mixture, which was stirred at 100 °C for another 2 h. The solvent was removed by vacuum. The crude product was subjected to column chromatography (Silical gel 10% EA/PE) to give **3c** as a solid.

**Data for 3c.** <sup>1</sup>H NMR (600 MHz, CDCl<sub>3</sub>, ppm): δ 8.36 (1H, m), 7.98 (1H, m), 7.69 (1H, m), 4.35 (2H, m), 1.76 (2H, m), 1.25 (26H, m), 0.88 (3H, m).

## Notes and references

1. B. Zha, M. Q. Dong, X. R. Miao, S. Peng, Y. C. Wu, K. Miao, Y. Hu and W. L. Deng, *Nanoscale*, 2017, **9**, 237–250.

### 3. Electrostatic potential (ESP) maps of 6-Br-Co16 and 6,8-Br-Co16.

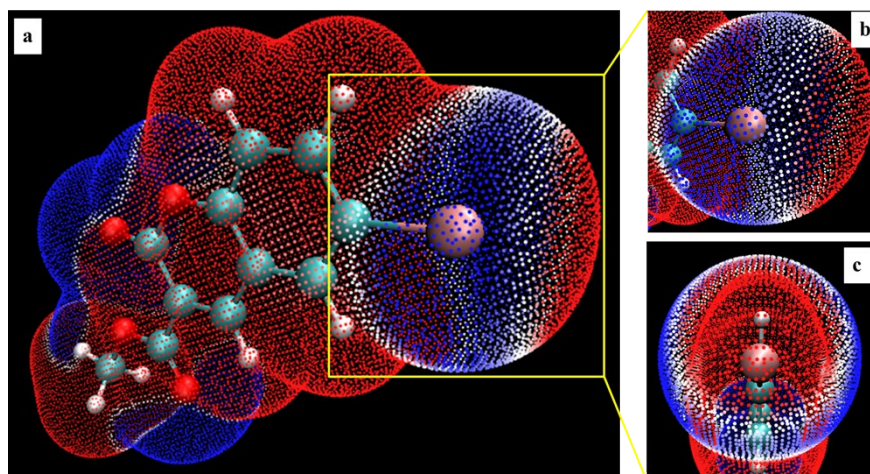

**Fig. S1** (a) Electrostatic potential (ESP) maps of 6-Br-Co16 under vacuum, Inset iamges (b,c) show the ESP maps of Br atom. The map color scales from  $-4$  (blue) to  $4$  (red) kcal/mol. The alkyl chains were replaced by methyl substituents.

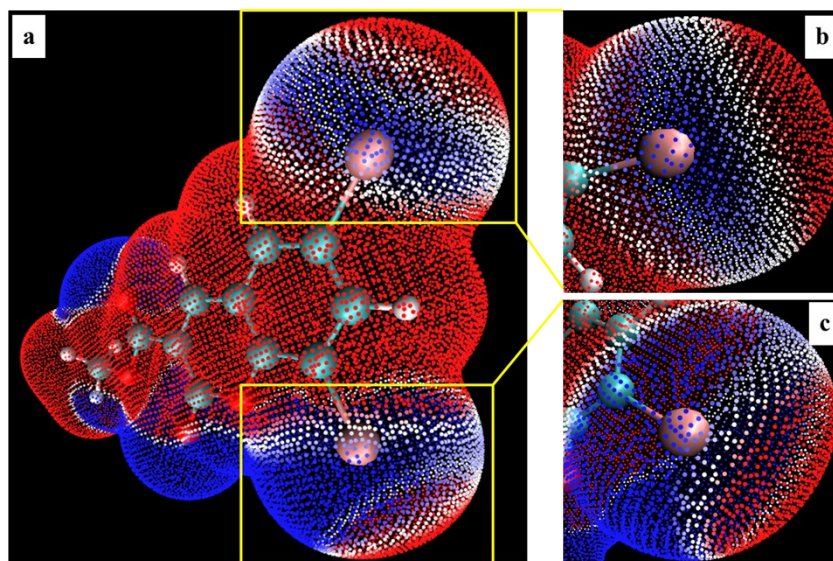

**Fig. S2** (a) Electrostatic potential (ESP) maps of 6,8-Br-Co16 under vacuum, Inset iamges (b,c) show the ESP maps of Br atoms. The map color scales from  $-4$  (blue) to  $4$  (red) kcal/mol. The alkyl chains were replaced by methyl substituents.
